# Supplementary material
Source: publisher site journal article supplement (https://www.spandidos-publications.com/2974/downloadSupplementary)
Supplement: Supplementary file 1 [file downloadSupplementary]

## Sheet: miRNA-Target pairs
List of miRNA-target regulatory pairs
Gene	miRNA	StemLoopID	miRanda	miRDB	miRWalk	RNA22	Targetscan	SUM
TRMT5	hsa-miR-125b	hsa-mir-125b-2	1	1	1	1	1	5
TRMT5	hsa-miR-34b	hsa-mir-34b	1	1	1	1	1	5
TM4SF1	hsa-miR-206	hsa-mir-206	1	1	1	1	1	5
THBS1	hsa-miR-200a	hsa-mir-200a	1	1	1	1	1	5
THBS1	hsa-miR-206	hsa-mir-206	1	1	1	1	1	5
THBS1	hsa-miR-141	hsa-mir-141	1	1	1	1	1	5
TGFBI	hsa-miR-181b	hsa-mir-181b-2	1	1	1	1	1	5
TGFBI	hsa-miR-181c	hsa-mir-181c	1	1	1	1	1	5
TGFBI	hsa-miR-181d	hsa-mir-181d	1	1	1	1	1	5
TGFBI	hsa-miR-181a	hsa-mir-181a-1	1	1	1	1	1	5
TEX2	hsa-miR-363	hsa-mir-363	1	1	1	1	1	5
TEX2	hsa-miR-25	hsa-mir-25	1	1	1	1	1	5
STAT2	hsa-miR-25	hsa-mir-25	1	1	1	1	1	5
SOST	hsa-miR-511	hsa-mir-511-2	1	1	1	1	1	5
SOST	hsa-miR-422a	hsa-mir-422a	1	1	1	1	1	5
SNAI2	hsa-miR-511	hsa-mir-511-2	1	1	1	1	1	5
SNAI2	hsa-miR-507	hsa-mir-507	1	1	1	1	1	5
SLC40A1	hsa-miR-93	hsa-mir-93	1	1	1	1	1	5
SLC40A1	hsa-miR-20a	hsa-mir-20a	1	1	1	1	1	5
SLC40A1	hsa-miR-20b	hsa-mir-20b	1	1	1	1	1	5
SLC40A1	hsa-miR-519a	hsa-mir-519a-2	1	1	1	1	1	5
SLC14A1	hsa-miR-134	hsa-mir-134	1	1	1	1	1	5
PPIC	hsa-miR-29c	hsa-mir-29c	1	1	1	1	1	5
PLEK2	hsa-miR-107	hsa-mir-107	1	1	1	1	1	5
PLEK2	hsa-miR-103	hsa-mir-103-1	1	1	1	1	1	5
PBK	hsa-miR-20a	hsa-mir-20a	1	1	1	1	1	5
PBK	hsa-miR-20b	hsa-mir-20b	1	1	1	1	1	5
PBK	hsa-miR-520g	hsa-mir-520g	1	1	1	1	1	5
PBK	hsa-miR-520h	hsa-mir-520h	1	1	1	1	1	5
PBK	hsa-miR-520b	hsa-mir-520b	1	1	1	1	1	5
PBK	hsa-miR-302d	hsa-mir-302d	1	1	1	1	1	5
PBK	hsa-miR-93	hsa-mir-93	1	1	1	1	1	5
PBK	hsa-miR-106b	hsa-mir-106b	1	1	1	1	1	5
PBK	hsa-miR-106a	hsa-mir-106a	1	1	1	1	1	5
PAPPA	hsa-miR-182	hsa-mir-182	1	1	1	1	1	5
PAPPA	hsa-miR-16	hsa-mir-16-2	1	1	1	1	1	5
PAPPA	hsa-miR-497	hsa-mir-497	1	1	1	1	1	5
PAPPA	hsa-miR-511	hsa-mir-511-2	1	1	1	1	1	5
PAPPA	hsa-miR-150	hsa-mir-150	1	1	1	1	1	5
PAPPA	hsa-miR-195	hsa-mir-195	1	1	1	1	1	5
OXTR	hsa-miR-507	hsa-mir-507	1	1	1	1	1	5
OLFML3	hsa-miR-510	hsa-mir-510	1	1	1	1	1	5
NT5E	hsa-miR-422a	hsa-mir-422a	1	1	1	1	1	5
NRIP3	hsa-miR-133a	hsa-mir-133a-2	1	1	1	1	1	5
NRIP3	hsa-miR-133b	hsa-mir-133b	1	1	1	1	1	5
NPTX1	hsa-miR-144	hsa-mir-144	1	1	1	1	1	5
NPTX1	hsa-miR-152	hsa-mir-152	1	1	1	1	1	5
NPTX1	hsa-miR-363	hsa-mir-363	1	1	1	1	1	5
NEO1	hsa-miR-302a	hsa-mir-302a	1	1	1	1	1	5
NEO1	hsa-miR-302c	hsa-mir-302c	1	1	1	1	1	5
NEO1	hsa-miR-302d	hsa-mir-302d	1	1	1	1	1	5
NCAPG	hsa-miR-205	hsa-mir-205	1	1	1	1	1	5
MTSS1	hsa-miR-182	hsa-mir-182	1	1	1	1	1	5
MMP16	hsa-miR-144	hsa-mir-144	1	1	1	1	1	5
MMP16	hsa-miR-382	hsa-mir-382	1	1	1	1	1	5
MMP16	hsa-miR-211	hsa-mir-211	1	1	1	1	1	5
MMP16	hsa-miR-155	hsa-mir-155	1	1	1	1	1	5
MELK	hsa-miR-485-3p	hsa-mir-485	1	1	1	1	1	5
MELK	hsa-miR-181d	hsa-mir-181d	1	1	1	1	1	5
MCM10	hsa-miR-302c	hsa-mir-302c	1	1	1	1	1	5
MCM10	hsa-miR-340	hsa-mir-340	1	1	1	1	1	5
MCM10	hsa-miR-150	hsa-mir-150	1	1	1	1	1	5
MCM10	hsa-miR-373	hsa-mir-373	1	1	1	1	1	5
MAD2L1	hsa-miR-433	hsa-mir-433	1	1	1	1	1	5
LUM	hsa-miR-21	hsa-mir-21	1	1	1	1	1	5
KPNA2	hsa-miR-106b	hsa-mir-106b	1	1	1	1	1	5
KPNA2	hsa-miR-106a	hsa-mir-106a	1	1	1	1	1	5
KIF23	hsa-miR-103	hsa-mir-103-1	1	1	1	1	1	5
KIF23	hsa-miR-107	hsa-mir-107	1	1	1	1	1	5
KIF23	hsa-miR-15a	hsa-mir-15a	1	1	1	1	1	5
KIF11	hsa-miR-381	hsa-mir-381	1	1	1	1	1	5
IGFBP5	hsa-miR-143	hsa-mir-143	1	1	1	1	1	5
HPS5	hsa-miR-519a	hsa-mir-519a-2	1	1	1	1	1	5
HPS5	hsa-miR-93	hsa-mir-93	1	1	1	1	1	5
HMGA1	hsa-let-7d	hsa-let-7d	1	1	1	1	1	5
GLS	hsa-miR-181d	hsa-mir-181d	1	1	1	1	1	5
GLS	hsa-miR-181c	hsa-mir-181c	1	1	1	1	1	5
GLS	hsa-miR-181a	hsa-mir-181a-1	1	1	1	1	1	5
FKBP5	hsa-miR-511	hsa-mir-511-2	1	1	1	1	1	5
DCBLD2	hsa-miR-520h	hsa-mir-520h	1	1	1	1	1	5
DCBLD2	hsa-miR-20b	hsa-mir-20b	1	1	1	1	1	5
DCBLD2	hsa-miR-498	hsa-mir-498	1	1	1	1	1	5
DCBLD2	hsa-miR-519a	hsa-mir-519a-2	1	1	1	1	1	5
DCBLD2	hsa-miR-142-5p	hsa-mir-142	1	1	1	1	1	5
CYP2S1	hsa-miR-15a	hsa-mir-15a	1	1	1	1	1	5
CYP2S1	hsa-miR-15b	hsa-mir-15b	1	1	1	1	1	5
CYP1B1	hsa-miR-200c	hsa-mir-200c	1	1	1	1	1	5
CYBRD1	hsa-miR-20a	hsa-mir-20a	1	1	1	1	1	5
CYBRD1	hsa-miR-93	hsa-mir-93	1	1	1	1	1	5
CYBRD1	hsa-miR-106a	hsa-mir-106a	1	1	1	1	1	5
CYBRD1	hsa-miR-372	hsa-mir-372	1	1	1	1	1	5
CYBRD1	hsa-miR-519a	hsa-mir-519a-2	1	1	1	1	1	5
CYBRD1	hsa-miR-520b	hsa-mir-520b	1	1	1	1	1	5
CYBRD1	hsa-miR-512-3p	hsa-mir-512-2	1	1	1	1	1	5
CYBRD1	hsa-miR-373	hsa-mir-373	1	1	1	1	1	5
CYBRD1	hsa-miR-20b	hsa-mir-20b	1	1	1	1	1	5
CYBRD1	hsa-miR-520e	hsa-mir-520e	1	1	1	1	1	5
CTSK	hsa-miR-519a	hsa-mir-519a-2	1	1	1	1	1	5
CTSK	hsa-miR-20a	hsa-mir-20a	1	1	1	1	1	5
CTSK	hsa-miR-106b	hsa-mir-106b	1	1	1	1	1	5
CTSK	hsa-miR-20b	hsa-mir-20b	1	1	1	1	1	5
CTSK	hsa-miR-93	hsa-mir-93	1	1	1	1	1	5
CTSK	hsa-miR-519d	hsa-mir-519d	1	1	1	1	1	5
CTSK	hsa-miR-106a	hsa-mir-106a	1	1	1	1	1	5
CTSK	hsa-miR-7	hsa-mir-7-3	1	1	1	1	1	5
CROT	hsa-miR-20a	hsa-mir-20a	1	1	1	1	1	5
CROT	hsa-miR-519d	hsa-mir-519d	1	1	1	1	1	5
CROT	hsa-miR-372	hsa-mir-372	1	1	1	1	1	5
CROT	hsa-miR-20b	hsa-mir-20b	1	1	1	1	1	5
CROT	hsa-miR-373	hsa-mir-373	1	1	1	1	1	5
CROT	hsa-miR-106b	hsa-mir-106b	1	1	1	1	1	5
CROT	hsa-miR-93	hsa-mir-93	1	1	1	1	1	5
CROT	hsa-miR-520b	hsa-mir-520b	1	1	1	1	1	5
CRISPLD2	hsa-miR-145	hsa-mir-145	1	1	1	1	1	5
CREB3L2	hsa-miR-25	hsa-mir-25	1	1	1	1	1	5
COL22A1	hsa-miR-324-3p	hsa-mir-324	1	1	1	1	1	5
CHSY1	hsa-miR-221	hsa-mir-221	1	1	1	1	1	5
CHSY1	hsa-miR-222	hsa-mir-222	1	1	1	1	1	5
CHSY1	hsa-miR-206	hsa-mir-206	1	1	1	1	1	5
CHSY1	hsa-miR-515-5p	hsa-mir-515-2	1	1	1	1	1	5
CENPN	hsa-miR-223	hsa-mir-223	1	1	1	1	1	5
CDKN3	hsa-miR-181d	hsa-mir-181d	1	1	1	1	1	5
CDCP1	hsa-miR-506	hsa-mir-506	1	1	1	1	1	5
CDCA7	hsa-miR-520f	hsa-mir-520f	1	1	1	1	1	5
CDCA7	hsa-miR-520b	hsa-mir-520b	1	1	1	1	1	5
CDCA7	hsa-miR-302b	hsa-mir-302b	1	1	1	1	1	5
CDCA7	hsa-miR-302a	hsa-mir-302a	1	1	1	1	1	5
CDCA7	hsa-miR-302d	hsa-mir-302d	1	1	1	1	1	5
CDCA7	hsa-miR-106a	hsa-mir-106a	1	1	1	1	1	5
CDCA7	hsa-miR-373	hsa-mir-373	1	1	1	1	1	5
CD44	hsa-miR-302c	hsa-mir-302c	1	1	1	1	1	5
CD44	hsa-miR-512-3p	hsa-mir-512-2	1	1	1	1	1	5
CD44	hsa-miR-302a	hsa-mir-302a	1	1	1	1	1	5
CD44	hsa-miR-302d	hsa-mir-302d	1	1	1	1	1	5
CD44	hsa-miR-302b	hsa-mir-302b	1	1	1	1	1	5
CD44	hsa-miR-512-5p	hsa-mir-512-2	1	1	1	1	1	5
CCL2	hsa-miR-1	hsa-mir-1-1	1	1	1	1	1	5
ANLN	hsa-miR-217	hsa-mir-217	1	1	1	1	1	5
ALCAM	hsa-miR-18a	hsa-mir-18a	1	1	1	1	1	5
ALCAM	hsa-miR-18b	hsa-mir-18b	1	1	1	1	1	5
